# Supplementary material for: Changes in the hemagglutinin of H5N1 viruses during human infection – Influence on receptor binding
Source: PubMed Central journal article supplement (PMC3820038; doi:10.1016/j.virol.2013.08.010), 2013-12
Supplement: mmc1.pdf [file mmc1.pdf]

## **Changes in the Hemagglutinin of H5N1 Viruses during Human Infection – Influence on Receptor Binding**

Martin Crusat, Junfeng Liu, Angelina S. Palma, Robert A. Childs, Yan Liu, et al

### **SUPPLEMENTARY INFORMATION**

**Table S1** Hemagglutination titers of additional MDCK cell-cultured human and avian Influenza A viruses.

**Table S2** Oligosaccharide probes<sup>a</sup> included in the microarrays, sorted by sialyl linkage and backbone sequences, and the binding signals (fluorescence intensities) they elicited with the six viruses, rVN1194, rVNCL105(Ala134Val), rVN1194(Ala134Val), rVNCL01(Glu186Asp), rVN1194(Glu186Asp) and X31.

**Table S3** The relative real space correlation coefficient of the ligand to Trp149.

**Table S4** Data collection and refinement statistics of rVN1194 H5 HA.

**Table S5** Data collection and refinement statistics of rVN1194(Ala134Val) H5 HA mutant.

**Table S6** Data collection and refinement statistics of rVN1194(Glu186Asp) H5 HA mutant.

**Table S7** Data collection and refinement statistics of rVN1194(Ile151Phe) H5 HA mutant

**Table S1** Hemagglutination titers of additional MDCK cell-cultured human and avian Influenza A viruses.

| <b>Virus</b>   | <b>Subtype</b> | <b>Origin</b> | <b>Horse</b> | <b>Guinea pig</b> |
|----------------|----------------|---------------|--------------|-------------------|
| A/VN/HTD538/04 | H1N1           | Human         | 0            | 192               |
| A/VN/HTD541/04 | H1N1           | Human         | 0            | 213               |
| A/VN/HTD547/04 | H1N1           | Human         | 0            | 128               |
| A/VN/CHY/04    | H1N1           | Human         | 0            | 128               |
| A/VN/HTD548/04 | H3N2           | Human         | 0            | 27                |
| A/VN/HTD558/04 | H3N2           | Human         | 0            | 32                |
| A/Ck/VLC1/06   | H5N1           | Chicken       | 277          | 176               |
| A/Ck/VLC2/06   | H5N1           | Chicken       | 170          | 120               |
| A/Ck/VLC3/06   | H5N1           | Chicken       | 160          | 152               |
| A/Ck/VLC4/06   | H5N1           | Chicken       | 203          | 140               |
| A/Ck/VLC11/06  | H5N1           | Chicken       | 427          | 216               |
| A/Ck/VLC12/06  | H5N1           | Chicken       | 149          | 60                |
| A/Ck/VLC16/06  | H5N1           | Chicken       | 235          | 240               |
| A/Ck/VLC19/06  | H5N1           | Chicken       | 139          | 76                |
| A/Ck/VLC21/06  | H5N1           | Chicken       | 139          | 144               |
| A/Ck/VLC22/06  | H5N1           | Chicken       | 821          | 184               |
| A/Ck/VLC24/06  | H5N1           | Chicken       | 501          | 184               |

<sup>†</sup>Geometric mean titers of triplicates

**Table S2** Oligosaccharide probes<sup>a</sup> included in the microarrays, sorted by sialyl linkage and backbone sequences, and the binding signals (fluorescence intensities) they elicited with the six viruses, rVN1194, rVNCL105(Ala134Val), rVN1194(Ala134Val), rVNCL01(Glu186Asp), rVN1194(Glu186Asp) and X31.

| ID                                                                               | Sequence                                                                                                                                     | Name                         | Fluorescence signal intensities <sup>b</sup> at 5 fmol per spot |                       |                      |                      |                      |     |
|----------------------------------------------------------------------------------|----------------------------------------------------------------------------------------------------------------------------------------------|------------------------------|-----------------------------------------------------------------|-----------------------|----------------------|----------------------|----------------------|-----|
|                                                                                  |                                                                                                                                              |                              | rVN1194                                                         | rVNCL105<br>Ala134Val | rVN1194<br>Ala134Val | rVNCL01<br>Glu186Asp | rVN1194<br>Glu186Asp | X31 |
| <b>Neutral</b>                                                                   |                                                                                                                                              |                              |                                                                 |                       |                      |                      |                      |     |
| 1                                                                                | Gal $\beta$ -4Glc-AO                                                                                                                         | Lac-AO                       | -                                                               | -                     | -                    | 1309                 | 91                   | -   |
| 2                                                                                | Gal $\beta$ -4GlcNAc-AO                                                                                                                      | LacNAc-AO                    | -                                                               | -                     | 34                   | 330                  | 94                   | -   |
| 3                                                                                | Gal $\beta$ -3GlcNAc $\beta$ -3Gal $\beta$ -4Glc-DH                                                                                          | LNT                          | 35                                                              | -                     | -                    | -                    | 36                   | 14  |
| 4                                                                                | Gal $\beta$ -4GlcNAc $\beta$ -3Gal $\beta$ -4Glc-DH                                                                                          | LNnT                         | 17                                                              | 23                    | 7                    | -                    | 30                   | -   |
| 5                                                                                | Gal $\beta$ -4GlcNAc $\beta$ -3Gal $\beta$ -4Glc-DH<br>Fuca $\alpha$ -3                                                                      | LNFP-III                     | 31                                                              | 10                    | -                    | 73                   | 60                   | 13  |
| 6                                                                                | Gal $\beta$ -4GlcNAc $\beta$ -2Man $\alpha$ -6<br>Man $\beta$ -4GlcNAc $\beta$ -4GlcNAc-DH<br>Gal $\beta$ -4GlcNAc $\beta$ -2Man $\alpha$ -3 | NA2                          | 24                                                              | 13                    | 15                   | 93                   | 3                    | -   |
| <b>2-3 Sialyl<br/>Gal, Lactose and N-acetylactosamine-based linear backbones</b> |                                                                                                                                              |                              |                                                                 |                       |                      |                      |                      |     |
| 7                                                                                | NeuAc $\alpha$ -3Gal $\beta$ -Cer                                                                                                            | GM4                          | 92                                                              | 269                   | 27                   | 350                  | -                    | 36  |
| 8                                                                                | NeuAc $\alpha$ -3Gal $\beta$ -4Glc $\beta$ -Cer                                                                                              | GM3                          | 91                                                              | -                     | 23                   | -                    | 148                  | 60  |
| 9                                                                                | NeuGc $\alpha$ -3Gal $\beta$ -4Glc $\beta$ -Cer                                                                                              | GM3(Gc)                      | -                                                               | 2                     | -                    | -                    | 42                   | -   |
| 10                                                                               | NeuAc $\alpha$ -3Gal $\beta$ -4Glc $\beta$ -Cer                                                                                              | Haematoside                  | 6020                                                            | -                     | -                    | 978                  | 360                  | -   |
| 11                                                                               | NeuAc $\alpha$ -3Gal $\beta$ -4Glc-AO                                                                                                        | NeuAc $\alpha$ -(3')Lac-AO   | 683                                                             | 55                    | -                    | 1783                 | 3587                 | -   |
| 12                                                                               | KDN $\alpha$ -3Gal $\beta$ -4Glc $\beta$ -C30                                                                                                | GSC-199                      | -                                                               | -                     | -                    | -                    | -                    | 16  |
| 13                                                                               | NeuAc $\beta$ -3Gal $\beta$ -4Glc-AO                                                                                                         | NeuAc $\beta$ -(3')Lac-AO    | -                                                               | -                     | -                    | -                    | 79                   | 27  |
| 14                                                                               | Neu $\alpha$ -3Gal $\beta$ -4Glc-AO                                                                                                          | Neu $\alpha$ -(3')Lac-AO     | -                                                               | -                     | -                    | -                    | -                    | -   |
| 15                                                                               | Neu4,5Ac $\alpha$ -3Gal $\beta$ -4Glc-AO                                                                                                     | Neu4,5Ac-(3')Lac-AO          | 703                                                             | 250                   | 28                   | 5533                 | 10174                | 12  |
| 16                                                                               | (4-deoxy) NeuAc $\alpha$ -3Gal $\beta$ -4Glc $\beta$ -Cer36                                                                                  | GSC-75                       | 13                                                              | -                     | 107                  | 449                  | 55                   | 5   |
| 17                                                                               | (7-deoxy) NeuAc $\alpha$ -3Gal $\beta$ -4Glc $\beta$ -Cer36                                                                                  | GSC-76                       | 167                                                             | 143                   | 127                  | 434                  | 208                  | 121 |
| 18                                                                               | (8-deoxy) NeuAc $\alpha$ -3Gal $\beta$ -4Glc $\beta$ -Cer36                                                                                  | GSC-77                       | 10                                                              | 9                     | -                    | 129                  | 190                  | -   |
| 19                                                                               | (9-deoxy) NeuAc $\alpha$ -3Gal $\beta$ -4Glc $\beta$ -Cer36                                                                                  | GSC-51                       | 39                                                              | 2                     | 70                   | 323                  | 65                   | 5   |
| 20                                                                               | (4-OMe) NeuAc $\alpha$ -3Gal $\beta$ -4Glc $\beta$ -Cer36                                                                                    | GSC-78                       | 24                                                              | 2                     | -                    | 714                  | 145                  | -   |
| 21                                                                               | (9-OMe) NeuAc $\alpha$ -3Gal $\beta$ -4Glc $\beta$ -Cer36                                                                                    | GSC-79                       | 41                                                              | 11                    | -                    | 183                  | 70                   | -   |
| 22                                                                               | NeuAc $\alpha$ -3Gal $\beta$ -4Glc $\beta$ -C30<br>Fuca $\alpha$ -3                                                                          | GSC-161                      | 10                                                              | 45                    | -                    | 1567                 | 714                  | -   |
| 23                                                                               | NeuAc $\alpha$ -3Gal $\beta$ -3GlcNAc-AO                                                                                                     | NeuAc $\alpha$ -(3')LN1-3-AO | 3841                                                            | 321                   | 40                   | 8869                 | 10706                | 228 |
| 24                                                                               | NeuAc $\alpha$ -3Gal $\beta$ -4GlcNAc-DH                                                                                                     | NeuAc $\alpha$ -(3')LN       | -                                                               | -                     | -                    | -                    | -                    | 35  |

|                                                                                       |                                                                                                       |                           |       |     |     |       |       |      |
|---------------------------------------------------------------------------------------|-------------------------------------------------------------------------------------------------------|---------------------------|-------|-----|-----|-------|-------|------|
| 25                                                                                    | NeuAc $\alpha$ -3Gal $\beta$ -4GlcNAc-AO                                                              | NeuAc $\alpha$ -(3')LN-AO | 872   | 55  | -   | 3198  | 4044  | 67   |
| 26                                                                                    | NeuAc $\alpha$ -3Gal $\beta$ -3GlcNAc-AO<br> <br>Fuc $\alpha$ -4                                      | SA(3')-Lea-Tri-AO         | 759   | 64  | 26  | 4363  | 6874  | 44   |
| 27                                                                                    | NeuAc $\alpha$ -3Gal $\beta$ -4GlcNAc-AO<br> <br>Fuc $\alpha$ -3                                      | SA(3')-Lex-Tri-AO         | 71    | -   | -   | 502   | 924   | 62   |
| 28                                                                                    | NeuAc $\alpha$ -3Gal $\beta$ -4GlcNAc $\beta$ -C30<br> <br>Fuc $\alpha$ -3                            | GSC-440                   | -     | 1   | -   | 171   | 31    | 19   |
| 29                                                                                    | Neu4,5Ac $\alpha$ -3Gal $\beta$ -4GlcNAc $\beta$ -C30<br> <br>Fuc $\alpha$ -3                         | GSC-512                   | 55    | 11  | -   | 223   | 81    | -    |
| 30                                                                                    | Neu5,9Ac $\alpha$ -3Gal $\beta$ -3GlcNAc $\beta$ -C30<br> <br>Fuc $\alpha$ -4                         | GSC-513                   | 10    | -   | -   | 310   | -     | -    |
| 31                                                                                    | Neu5,9Ac $\alpha$ -3Gal $\beta$ -4GlcNAc $\beta$ -C30<br> <br>Fuc $\alpha$ -3                         | GSC-511                   | -     | 658 | -   | 283   | 234   | -    |
| <b>2-3 Sialyl<br/>Lacto-N-neotetraose and Lacto-N-tetraose-based linear backbones</b> |                                                                                                       |                           |       |     |     |       |       |      |
| 32                                                                                    | NeuAc $\alpha$ -3Gal $\beta$ -4GlcNAc $\beta$ -3Gal $\beta$ -C30<br> <br>Fuc $\alpha$ -3              | GSC-479                   | 257   | 91  | 22  | 3302  | 2646  | 64   |
| 33                                                                                    | NeuAc $\alpha$ -3Gal $\beta$ -4GlcNAc $\beta$ -3Gal $\beta$ -Cer36<br> <br>Fuc $\alpha$ -3            | GSC-105                   | 186   | 43  | 6   | 768   | 142   | 28   |
| 34                                                                                    | NeuGc $\alpha$ -3Gal $\beta$ -4GlcNAc $\beta$ -3Gal $\beta$ -Cer36<br> <br>Fuc $\alpha$ -3            | GSC-177                   | -     | -   | 50  | 199   | 63    | 24   |
| 35                                                                                    | KDN $\alpha$ -3Gal $\beta$ -4GlcNAc $\beta$ -3Gal $\beta$ -C30<br> <br>Fuc $\alpha$ -3                | GSC-341                   | -     | -   | -   | 160   | 39    | -    |
| 36                                                                                    | NeuAc $\alpha$ -3(4,6-deoxy)Gal $\beta$ -4GlcNAc $\beta$ -3Gal $\beta$ -Cer36<br> <br>Fuc $\alpha$ -3 | GSC-257                   | 47    | -   | -   | 266   | 79    | 276  |
| 37                                                                                    | NeuAc $\alpha$ -3(4-deoxy)Gal $\beta$ -4GlcNAc $\beta$ -3Gal $\beta$ -Cer36<br> <br>Fuc $\alpha$ -3   | GSC-175                   | 46    | 15  | -   | 340   | 32    | 372  |
| 38                                                                                    | NeuAc $\alpha$ -3(6-deoxy)Gal $\beta$ -4GlcNAc $\beta$ -3Gal $\beta$ -Cer36<br> <br>Fuc $\alpha$ -3   | GSC-176                   | 116   | 34  | -   | 742   | 80    | 26   |
| 39                                                                                    | NeuAc $\alpha$ -3Gal $\beta$ -3GlcNAc $\beta$ -3Gal $\beta$ -4Glc-DH                                  | LSTa                      | 4884  | 598 | 452 | 11255 | 17761 | 913  |
| 40                                                                                    | NeuAc $\alpha$ -3Gal $\beta$ -3GlcNAc $\beta$ -3Gal $\beta$ -4Glc $\beta$ -C30                        | GSC-272                   | 11368 | 513 | 238 | 36466 | 33320 | 6289 |
| 41                                                                                    | NeuAc $\alpha$ -3Gal $\beta$ -4GlcNAc $\beta$ -3Gal $\beta$ -4Glc $\beta$ -C30                        | GSC-273                   | 8016  | 379 | 198 | 31552 | 24121 | 3009 |
| 42                                                                                    | NeuGc $\alpha$ -3Gal $\beta$ -3GlcNAc $\beta$ -3Gal $\beta$ -4Glc $\beta$ -C30                        | GSC-396                   | -     | -   | 60  | 368   | 101   | -    |
| 43                                                                                    | NeuAc $\alpha$ -3Gal $\beta$ -4GlcNAc $\beta$ -3Gal $\beta$ -4Glc $\beta$ -Cer                        | Sialylparagloboside       | 3093  | 181 | 45  | 2314  | 4147  | 166  |
| 44                                                                                    | NeuAc $\alpha$ -3Gal $\beta$ -4GlcNAc $\beta$ -3Gal $\beta$ -4Glc $\beta$ -Cer36                      | GSC-31                    | 265   | 34  | -   | 1487  | 1099  | 2    |
| 45                                                                                    | Neu $\alpha$ -3Gal $\beta$ -4GlcNAc $\beta$ -3Gal $\beta$ -4Glc $\beta$ -Cer36<br> <br>SU-6           | GSC-516B                  | 30    | 3   | -   | 416   | 38    | 34   |

|                                         |                                                                                                                                                                                                                                                                                       |                 |       |      |      |       |       |      |
|-----------------------------------------|---------------------------------------------------------------------------------------------------------------------------------------------------------------------------------------------------------------------------------------------------------------------------------------|-----------------|-------|------|------|-------|-------|------|
| 46                                      | NeuAc $\alpha$ -3Gal $\beta$ -4GlcNAc $\beta$ -3Gal $\beta$ -3GlcNAc-DH<br><div style="text-align: center;">                                                      <br/>           SU-6            SU-6            SU-6         </div>                                                 | C4U             | 25180 | 3086 | 801  | 33304 | 49063 | 2308 |
| 47                                      | NeuAc $\alpha$ -3Gal $\beta$ -3GlcNAc $\beta$ -3Gal $\beta$ -4Glc-DH<br><div style="text-align: center;">            <br/>           Fuca-4         </div>                                                                                                                            | SA(3')-LNFP-II  | 473   | 195  | 134  | 2352  | 4738  | 291  |
| 48                                      | NeuAc $\alpha$ -3Gal $\beta$ -4GlcNAc $\beta$ -3Gal $\beta$ -4Glc-DH<br><div style="text-align: center;">            <br/>           Fuca-3         </div>                                                                                                                            | SA(3')-LNFP-III | 1677  | 1062 | 1045 | 10083 | 14261 | 886  |
| 49                                      | NeuAc $\alpha$ -3Gal $\beta$ -4GlcNAc $\beta$ -3Gal $\beta$ -4Glc $\beta$ -Cer36<br><div style="text-align: center;">            <br/>           Fuca-3         </div>                                                                                                                | GSC-64          | 284   | 107  | -    | 798   | 1840  | 123  |
| 50                                      | NeuAc $\alpha$ -3Gal $\beta$ -4GlcNAc $\beta$ -3Gal $\beta$ -4Glc $\beta$ -Cer36<br><div style="text-align: center;">            <br/>           Fuca-3         </div>                                                                                                                | GSC-533         | 558   | 133  | -    | 2076  | 1351  | 43   |
| 51                                      | KDN $\alpha$ -3Gal $\beta$ -4GlcNAc $\beta$ -3Gal $\beta$ -4Glc $\beta$ -Cer36<br><div style="text-align: center;">            <br/>           Fuca-3         </div>                                                                                                                  | GSC-149         | -     | 4    | 34   | 456   | 85    | 12   |
| 52                                      | Neu $\alpha$ -3Gal $\beta$ -4GlcNAc $\beta$ -3Gal $\beta$ -4Glc $\beta$ -Cer36<br><div style="text-align: center;">            <br/>           Fuca-3         </div>                                                                                                                  | GSC-472         | -     | 20   | 30   | 203   | -     | 17   |
| 53                                      | <div style="text-align: center;">           SU-6<br/>            <br/>           NeuAc<math>\alpha</math>-3Gal<math>\beta</math>-4GlcNAc<math>\beta</math>-3Gal<math>\beta</math>-4Glc<math>\beta</math>-Cer36<br/>            <br/>           Fuca-3         </div>                  | GSC-268         | 66    | 101  | 50   | 3047  | 8926  | 151  |
| 54                                      | <div style="text-align: center;">           SU-6<br/>            <br/>           Neu<math>\alpha</math>-3Gal<math>\beta</math>-4GlcNAc<math>\beta</math>-3Gal<math>\beta</math>-4Glc<math>\beta</math>-Cer36<br/>            <br/>           Fuca-3         </div>                    | GSC-268 deNAc   | 19    | 8    | 5    | 30    | -     | -    |
| 55                                      | <div style="text-align: center;">           SU-6<br/>            <br/>           NeuAc<math>\alpha</math>-3Gal<math>\beta</math>-4GlcNAc<math>\beta</math>-3Gal<math>\beta</math>-4Glc<math>\beta</math>-Cer36<br/>            <br/>           Fuca-3         </div>                  | GSC-269         | 2280  | 1130 | 1064 | 8163  | 10462 | 450  |
| 56                                      | <div style="text-align: center;">           SU-6<br/>            <br/>           Neu<math>\alpha</math>-3Gal<math>\beta</math>-4GlcNAc<math>\beta</math>-3Gal<math>\beta</math>-4Glc<math>\beta</math>-Cer36<br/>            <br/>           Fuca-3         </div>                    | GSC-406         | -     | 13   | -    | -     | 72    | 37   |
| 57                                      | <div style="text-align: center;">           SU-6    SU-6<br/>                     <br/>           NeuAc<math>\alpha</math>-3Gal<math>\beta</math>-4GlcNAc<math>\beta</math>-3Gal<math>\beta</math>-4Glc<math>\beta</math>-Cer36<br/>            <br/>           Fuca-3         </div> | GSC-270         | 357   | 255  | 106  | 6150  | 15234 | 182  |
| 58                                      | NeuAc $\alpha$ -3Gal $\beta$ -4GlcNAc $\beta$ -3Gal $\beta$ -4GlcNAc $\beta$ -3Gal $\beta$ -4Glc $\beta$ -Cer36<br><div style="text-align: center;">                                 <br/>           Fuca-3            Fuca-3         </div>                                          | GSC-220         | 2146  | 357  | -    | 2421  | 6399  | 507  |
| 59                                      | NeuAc $\alpha$ -3Gal $\beta$ -4GlcNAc $\beta$ -3Gal $\beta$ -4GlcNAc $\beta$ -3Gal $\beta$ -4Glc $\beta$ -Cer36<br><div style="text-align: center;">            <br/>           Fuca-3         </div>                                                                                 | GSC-221         | 4576  | 407  | 123  | 4325  | 11085 | 1547 |
| <b>2-3 Sialyl<br/>Branched backbone</b> |                                                                                                                                                                                                                                                                                       |                 |       |      |      |       |       |      |

|                                       |                                                                                                                                                                                                                                                                                                                                                                                                                                                                                                                                                                           |          |       |      |      |       |       |       |
|---------------------------------------|---------------------------------------------------------------------------------------------------------------------------------------------------------------------------------------------------------------------------------------------------------------------------------------------------------------------------------------------------------------------------------------------------------------------------------------------------------------------------------------------------------------------------------------------------------------------------|----------|-------|------|------|-------|-------|-------|
| 60                                    | $  \begin{array}{c}  \text{Gal}\beta\text{-4GlcNAc}\beta\text{-6} \\    \\  \text{Fuca}\alpha\text{-3} \quad \text{Gal}\beta\text{-4Glc-DH} \\    \\  \text{NeuAc}\alpha\text{-3Gal}\beta\text{-3GlcNAc}\beta\text{-3}  \end{array}  $                                                                                                                                                                                                                                                                                                                                    | MSMFLNH  | 9152  | 832  | 1264 | 18421 | 21915 | 3167  |
| <b>2-3 Sialyl N-glycans</b>           |                                                                                                                                                                                                                                                                                                                                                                                                                                                                                                                                                                           |          |       |      |      |       |       |       |
| 61                                    | $  \begin{array}{c}  \text{NeuAc}\alpha\text{-3Gal}\beta\text{-4GlcNAc}\beta\text{-2Man}\alpha\text{-6} \quad \text{Fuca}\alpha\text{-6} \\    \quad \quad \quad   \\  \text{Man}\beta\text{-4GlcNAc}\beta\text{-4GlcNAc-DH} \\    \\  \text{NeuAc}\alpha\text{-3Gal}\beta\text{-4GlcNAc}\beta\text{-2Man}\alpha\text{-3}  \end{array}  $                                                                                                                                                                                                                                 | A2F(2-3) | 30469 | 4042 | 4939 | 36210 | 49408 | 14413 |
| 62                                    | $  \begin{array}{c}  \text{NeuAc}\alpha\text{-3Gal}\beta\text{-4GlcNAc}\beta\text{-6} \\    \\  \text{NeuAc}\alpha\text{-3Gal}\beta\text{-4GlcNAc}\beta\text{-2Man}\alpha\text{-6} \quad \text{Fuca}\alpha\text{-6} \\    \quad \quad \quad   \\  \text{Man}\beta\text{-4GlcNAc}\beta\text{-4GlcNAc-DH} \\    \\  \text{NeuAc}\alpha\text{-3Gal}\beta\text{-4GlcNAc}\beta\text{-2Man}\alpha\text{-3}  \end{array}  $                                                                                                                                                      | P22-1    | 20776 | 1054 | 3537 | 31785 | 33393 | 3928  |
| 63                                    | $  \begin{array}{c}  \text{NeuAc}\alpha\text{-3Gal}\beta\text{-4GlcNAc}\beta\text{-6} \\    \\  \text{NeuAc}\alpha\text{-3Gal}\beta\text{-4GlcNAc}\beta\text{-2Man}\alpha\text{-6} \quad \text{Fuca}\alpha\text{-6} \\    \quad \quad \quad   \\  \text{Man}\beta\text{-4GlcNAc}\beta\text{-4GlcNAc-DH} \\    \\  \text{NeuAc}\alpha\text{-3Gal}\beta\text{-4GlcNAc}\beta\text{-2Man}\alpha\text{-3} \\    \\  \text{NeuAc}\alpha\text{-3Gal}\beta\text{-4GlcNAc}\beta\text{-4}  \end{array}  $                                                                           | P6-1     | 15379 | 591  | 1322 | 16326 | 26582 | 662   |
| 64                                    | $  \begin{array}{c}  \text{NeuAc}\alpha\text{-3Gal}\beta\text{-4GlcNAc}\beta\text{-6} \\    \\  \text{NeuAc}\alpha\text{-3Gal}\beta\text{-4GlcNAc}\beta\text{-3Gal}\beta\text{-4GlcNAc}\beta\text{-2Man}\alpha\text{-6} \quad \text{Fuca}\alpha\text{-6} \\    \quad \quad \quad   \\  \text{Man}\beta\text{-4GlcNAc}\beta\text{-4GlcNAc-DH} \\    \\  \text{NeuAc}\alpha\text{-3Gal}\beta\text{-4GlcNAc}\beta\text{-2Man}\alpha\text{-3} \\    \\  \text{NeuAc}\alpha\text{-3Gal}\beta\text{-4GlcNAc}\beta\text{-4}  \end{array}  $                                      | P7-2     | 18621 | 807  | 1556 | 19013 | 25773 | 897   |
| 65                                    | $  \begin{array}{c}  \text{NeuAc}\alpha\text{-3Gal}\beta\text{-4GlcNAc}\beta\text{-3Gal}\beta\text{-4GlcNAc}\beta\text{-6} \\    \\  \text{NeuAc}\alpha\text{-3Gal}\beta\text{-4GlcNAc}\beta\text{-3Gal}\beta\text{-4GlcNAc}\beta\text{-2Man}\alpha\text{-6} \quad \text{Fuca}\alpha\text{-6} \\    \quad \quad \quad   \\  \text{Man}\beta\text{-4GlcNAc}\beta\text{-4GlcNAc-DH} \\    \\  \text{NeuAc}\alpha\text{-3Gal}\beta\text{-4GlcNAc}\beta\text{-2Man}\alpha\text{-3} \\    \\  \text{NeuAc}\alpha\text{-3Gal}\beta\text{-4GlcNAc}\beta\text{-4}  \end{array}  $ | P8-1     | 44179 | 3553 | 845  | 38697 | 43250 | 2958  |
| <b>2-3 Sialyl Ganglioside related</b> |                                                                                                                                                                                                                                                                                                                                                                                                                                                                                                                                                                           |          |       |      |      |       |       |       |
| 66                                    | $  \begin{array}{c}  \text{GalNAc}\beta\text{-4Gal}\beta\text{-4Glc}\beta\text{-Cer} \\    \\  \text{NeuAc}\alpha\text{-3}  \end{array}  $                                                                                                                                                                                                                                                                                                                                                                                                                                | GM2      | -     | 40   | -    | -     | 16    | 28    |

|                                                                                   |                                                                                                                         |                            |      |     |    |      |      |      |
|-----------------------------------------------------------------------------------|-------------------------------------------------------------------------------------------------------------------------|----------------------------|------|-----|----|------|------|------|
| 67                                                                                | Gal $\beta$ -3GalNAc $\beta$ -4Gal $\beta$ -4Glc $\beta$ -Cer<br> <br>NeuAc $\alpha$ -3                                 | GM1                        | 9    | -   | 39 | 686  | -    | -    |
| 68                                                                                | Gal $\beta$ -3GalNAc $\beta$ -4Gal $\beta$ -4Glc-DH<br> <br>NeuAc $\alpha$ -3                                           | GM1-penta                  | -    | 509 | -  | 290  | -    | -    |
| 69                                                                                | Gal $\beta$ -3GalNAc $\beta$ -4Gal $\beta$ -4Glc $\beta$ -Cer<br> <br>NeuGc $\alpha$ -3                                 | GM1(Gc)                    | -    | 30  | -  | 121  | -    | -    |
| 70                                                                                | Gal $\beta$ -3GalNAc $\beta$ -4Gal $\beta$ -4Glc-DH<br> <br>NeuGc $\alpha$ -3                                           | GM1(Gc)-penta              | 73   | -   | -  | 384  | 55   | 11   |
| 71                                                                                | KDN $\alpha$ -3Gal $\beta$ -3GalNAc $\beta$ -4Gal $\beta$ -4Glc $\beta$ -Cer <sub>36</sub><br> <br>KDN $\alpha$ -3      | GSC-195                    | -    | -   | 28 | 232  | 101  | -    |
| 72                                                                                | NeuAc $\alpha$ -3Gal $\beta$ -3GalNAc $\beta$ -4Gal $\beta$ -4Glc $\beta$ -Cer<br> <br>NeuAc $\alpha$ -3                | GD1a                       | 779  | 57  | -  | 684  | 2181 | 47   |
| 73                                                                                | NeuAc $\alpha$ -3Gal $\beta$ -3GalNAc $\beta$ -4Gal $\beta$ -4Glc-DH<br> <br>NeuAc $\alpha$ -3                          | GD1a-hexa                  | 3105 | 133 | 23 | 4312 | 7318 | 118  |
| 74                                                                                | SU-6<br> <br>NeuAc $\alpha$ -3Gal $\beta$ -3GalNAc $\beta$ -4Gal $\beta$ -4Glc $\beta$ -Cer <sub>36</sub>               | GSC-335                    | 890  | 12  | -  | 2064 | 1053 | 203  |
| <b>2-3 Sialyl<br/>O-glycan related</b>                                            |                                                                                                                         |                            |      |     |    |      |      |      |
| 75                                                                                | NeuAc $\alpha$ -3Gal $\beta$ -3GalNAc $\beta$ -C30                                                                      | GSC-488                    | -    | -   | -  | 82   | 36   | -    |
| 76                                                                                | SU-6<br> <br>NeuAc $\alpha$ -3Gal $\beta$ -3GalNAc $\beta$ -C30                                                         | GSC-489                    | 53   | -   | -  | 112  | 24   | -    |
| 77                                                                                | NeuAc $\alpha$ -3Gal $\beta$ -4GlcNAc $\beta$ -6Gal $\beta$ -4Glc $\beta$ -Cer <sub>36</sub><br> <br>Fuc $\alpha$ -3    | GSC-154                    | -    | 16  | 7  | 6    | 54   | -    |
| <b>2-3 Sialyl<br/>Miscellaneous</b>                                               |                                                                                                                         |                            |      |     |    |      |      |      |
| 78                                                                                | NeuAc $\alpha$ -3Gal $\beta$ -4GlcNAc $\beta$ -6GalNAc $\alpha$ -3Gal $\beta$ -4Glc $\beta$ -C30                        | GSC-441                    | 762  | 105 | 21 | 5839 | 7597 | 296  |
| 79                                                                                | NeuAc $\alpha$ -3Gal $\beta$ -4GlcNAc $\beta$ -4GalNAc $\beta$ -3Gal $\beta$ -4Glc $\beta$ -C30<br> <br>Fuc $\alpha$ -3 | GSC-384                    | 174  | 81  | 12 | 4209 | 4219 | 479  |
| 80                                                                                | GalNAc $\beta$ -6Gal $\beta$ -4Glc $\beta$ -Cer <sub>36</sub><br> <br>NeuAc $\alpha$ -3                                 | GSC-284                    | -    | 11  | -  | 420  | 199  | -    |
| <b>2-6 Sialyl<br/>Gal, Lactose and N-acetylglucosamine-based linear backbones</b> |                                                                                                                         |                            |      |     |    |      |      |      |
| 81                                                                                | NeuAc $\alpha$ -6Gal $\beta$ -Cer <sub>36</sub>                                                                         | GSC-27                     | 7    | 4   | 16 | 55   | 12   | -    |
| 82                                                                                | NeuAc $\alpha$ -6Gal $\beta$ -4Glc $\beta$ -Cer <sub>36</sub>                                                           | GSC-61                     | -    | 8   | 40 | 35   | -    | 11   |
| 83                                                                                | NeuAc $\alpha$ -6Gal $\beta$ -4Glc-AO                                                                                   | NeuAc $\alpha$ -(6')Lac-AO | -    | -   | 7  | 942  | 59   | 1190 |
| 84                                                                                | NeuAc $\beta$ -6Gal $\beta$ -4Glc-AO                                                                                    | NeuAc $\beta$ -(6')Lac-AO  | -    | -   | -  | -    | -    | -    |
| 85                                                                                | Neu $\alpha$ -6Gal $\beta$ -4Glc-AO                                                                                     | Neu $\alpha$ -(6')Lac-AO   | 206  | -   | -  | 1789 | 39   | -    |
| 86                                                                                | NeuAc $\alpha$ -6Gal $\beta$ -4GlcNAc                                                                                   | NeuAc $\alpha$ -(6')LN     | 16   | -   | -  | -    | 50   | 139  |

|                                                                                       |                                                                                                                                                                                          |                           |     |    |    |      |       |       |
|---------------------------------------------------------------------------------------|------------------------------------------------------------------------------------------------------------------------------------------------------------------------------------------|---------------------------|-----|----|----|------|-------|-------|
| 87                                                                                    | NeuAc $\alpha$ -6Gal $\beta$ -4GlcNAc-AO                                                                                                                                                 | NeuAc $\alpha$ -(6')LN-AO | -   | -  | 14 | 29   | 9     | 4100  |
| 88                                                                                    | Neu5,9Ac $\alpha$ -6Gal $\beta$ -4GlcNAc-DH                                                                                                                                              | Neu5,9Ac-(6')LN           | -   | -  | 17 | 590  | -     | -     |
| <b>2-6 Sialyl<br/>Lacto-N-neotetraose and Lacto-N-tetraose-based linear backbones</b> |                                                                                                                                                                                          |                           |     |    |    |      |       |       |
| 89                                                                                    | Gal $\beta$ -3GlcNAc $\beta$ -3Gal $\beta$ -4Glc-DH<br> <br>NeuAc $\alpha$ -6                                                                                                            | LSTb                      | 44  | -  | -  | -    | -     | -     |
| 90                                                                                    | NeuAc $\alpha$ -6Gal $\beta$ 4-GlcNAc $\beta$ 3-Gal $\beta$ 4-Glc-DH                                                                                                                     | LSTc                      | -   | 29 | -  | 436  | 764   | 18831 |
| 91                                                                                    | NeuGc $\alpha$ -6Gal $\beta$ -3GlcNAc $\beta$ -3Gal $\beta$ -4Glc $\beta$ -C30                                                                                                           | GSC-397                   | -   | -  | 16 | 107  | -     | 792   |
| 92                                                                                    | NeuAc $\alpha$ -6Gal $\beta$ -4GlcNAc $\beta$ -3Gal $\beta$ -4Glc $\beta$ -Cer36<br> <br>Fuca $\alpha$ -3                                                                                | GSC-97                    | 25  | 17 | 84 | 70   | 1006  | 1726  |
| 93                                                                                    | NeuAc $\alpha$ -6Gal $\beta$ -4GlcNAc $\beta$ -3Gal $\beta$ -4Glc-DH<br> <br>Fuca $\alpha$ -3                                                                                            | SA(6')-LNFP-VI            | 13  | 9  | -  | 163  | 387   | 13407 |
| <b>2-6 Sialyl<br/>Branched backbone</b>                                               |                                                                                                                                                                                          |                           |     |    |    |      |       |       |
| 94                                                                                    | NeuAc $\alpha$ -6Gal $\beta$ -4GlcNAc $\beta$ -6<br> <br>Gal $\beta$ -4Glc-DH<br> <br>Gal $\beta$ -3GlcNAc $\beta$ -3                                                                    | MSLNH                     | 4   | 11 | 38 | 64   | 72    | 5729  |
| 95                                                                                    | Gal $\beta$ -4GlcNAc $\beta$ -6<br> <br>Gal $\beta$ -4Glc-DH<br> <br>NeuAc $\alpha$ -6Gal $\beta$ -3GlcNAc $\beta$ -3                                                                    | MSLNnH-I                  | -   | 25 | 66 | 915  | 1686  | 14983 |
| 96                                                                                    | NeuAc $\alpha$ -6Gal $\beta$ -4GlcNAc $\beta$ -6<br> <br>Gal $\beta$ -4Glc-DH<br> <br>NeuAc $\alpha$ -6Gal $\beta$ -4GlcNAc $\beta$ -3                                                   | DSLNNH                    | 7   | 2  | 57 | 1045 | 4530  | 11709 |
| 97                                                                                    | Gal $\beta$ -4GlcNAc $\beta$ -6<br> <br>Fuca $\alpha$ -3<br> <br>Gal $\beta$ -4Glc-DH<br> <br>NeuAc $\alpha$ -6Gal $\beta$ -3GlcNAc $\beta$ -3                                           | MFMSLNnH                  | -   | 73 | -  | 272  | 1199  | 20367 |
| <b>2-6 Sialyl<br/>N-glycans</b>                                                       |                                                                                                                                                                                          |                           |     |    |    |      |       |       |
| 98                                                                                    | NeuAc $\alpha$ -6Gal $\beta$ -4GlcNAc $\beta$ -2Man $\alpha$ -6<br> <br>Man $\beta$ -4GlcNAc $\beta$ -4GlcNAc-DH<br> <br>NeuAc $\alpha$ -6Gal $\beta$ -4GlcNAc $\beta$ -2Man $\alpha$ -3 | A2(2-6)                   | 156 | 14 | 7  | 8768 | 18025 | 30875 |
| <b>2-6 Sialyl<br/>Ganglioside related</b>                                             |                                                                                                                                                                                          |                           |     |    |    |      |       |       |
| 99                                                                                    | GalNAc $\beta$ -4Gal $\beta$ -4Glc $\beta$ -Cer36<br> <br>NeuAc $\alpha$ -6                                                                                                              | GSC-442                   | 55  | 10 | -  | 49   | -     | -     |
| 100                                                                                   | NeuAc $\alpha$ -6Gal $\beta$ -3GalNAc $\beta$ -4Gal $\beta$ -4Glc $\beta$ -Cer36                                                                                                         | GSC-68                    | -   | -  | 48 | 222  | 61    | 11934 |



|                                                                                              |                                                                                                                                      |              |       |      |     |       |       |       |
|----------------------------------------------------------------------------------------------|--------------------------------------------------------------------------------------------------------------------------------------|--------------|-------|------|-----|-------|-------|-------|
| 101                                                                                          | Galβ-3GalNAcβ-4Galβ-4Glcβ-Cer36<br> <br>NeuAcα-6                                                                                     | GSC-155      | -     | 16   | -   | 217   | -     | 23    |
| 102                                                                                          | NeuAcα-6Galβ-3GalNAcβ-4Galβ-4Glcβ-Cer36<br> <br>NeuAcα-6                                                                             | GSC-107      | -     | 5    | 12  | 288   | 36    | 2047  |
| <b>2-6 Sialyl<br/>Miscellaneous</b>                                                          |                                                                                                                                      |              |       |      |     |       |       |       |
| 103                                                                                          | NeuAcα-6Galβ-6GalNAcβ-4Galβ-4Glcβ-Cer36                                                                                              | GSC-70       | 8     | 31   | 41  | 164   | -     | 486   |
| <b>2-3 and 2-6 Sialyl<br/>O-glycan related</b>                                               |                                                                                                                                      |              |       |      |     |       |       |       |
| 104                                                                                          | NeuAcα-3Galβ-3GalNAc-DH<br> <br>NeuAcα-6                                                                                             | DST          | 214   | 19   | -   | 2110  | 4227  | 62    |
| 105                                                                                          | NeuAcα-3Galβ-3GalNAc-AO<br> <br>NeuAcα-6                                                                                             | DST-AO       | 1739  | 39   | -   | 3346  | 3665  | -     |
| 106                                                                                          | NeuAcα-3Galβ-3GalNAcβ-C30<br> <br>NeuAcα-6                                                                                           | GSC-490      | -     | 4    | 17  | 27    | 24    | -     |
| <b>2-3 and 2-6 Sialyl<br/>Lacto-N-neotetraose and Lacto-N-tetraose-based linear backbone</b> |                                                                                                                                      |              |       |      |     |       |       |       |
| 107                                                                                          | NeuAcα-3Galβ-3GlcNAcβ-3Galβ-4Glc-DH<br> <br>NeuAcα-6                                                                                 | DSLNT        | 14208 | 1409 | 378 | 16686 | 34257 | 1132  |
| <b>2-3 and 2-6 Sialyl<br/>N-glycan</b>                                                       |                                                                                                                                      |              |       |      |     |       |       |       |
| 108                                                                                          | NeuAcα-3Galβ-4GlcNAcβ-2Manα-6<br> <br>Manβ-4GlcNAcβ-4GlcNAc-DH<br> <br>NeuAcα-3Galβ-4GlcNAcβ-4Manα-3<br> <br>NeuAcα-6Galβ-4GlcNAcβ-2 | A3           | 22147 | 2083 | 358 | 29544 | 36228 | 19599 |
| <b>2-3 and 2-6 Sialyl<br/>Ganglioside related</b>                                            |                                                                                                                                      |              |       |      |     |       |       |       |
| 109                                                                                          | NeuAcα-3Galβ-3GalNAcβ-4Galβ-4Glcβ-Cer36<br> <br>NeuAcα-6                                                                             | GSC-118      | 322   | 103  | 15  | 670   | 311   | 14    |
| <b>2-8 Sialyl<br/>Gal, Lactose and N-acetylglucosamine-based linear backbones</b>            |                                                                                                                                      |              |       |      |     |       |       |       |
| 110                                                                                          | NeuAcα-8NeuAcα-3Galβ-Cer36                                                                                                           | GSC-230      | 22    | -    | -   | 20    | 11    | 13    |
| 111                                                                                          | NeuAcα-8NeuAcα-6Galβ-Cer36                                                                                                           | GSC-231      | -     | -    | -   | 194   | -     | 24    |
| 112                                                                                          | NeuAcα-8NeuAcα-8NeuAcα-6Galβ-Cer36                                                                                                   | GSC-439      | -     | 7    | -   | 132   | -     | 42    |
| <b>2-8 Sialyl<br/>Ganglioside related</b>                                                    |                                                                                                                                      |              |       |      |     |       |       |       |
| 113                                                                                          | NeuAcα-8NeuAcα-3Galβ-4Glcβ-Cer                                                                                                       | GD3          | 30    | -    | -   | 1103  | 141   | -     |
| 114                                                                                          | NeuAcα-8NeuAcα-3Galβ-4Glc-AO                                                                                                         | GD3-tetra-AO | -     | 1    | -   | 6     | 234   | 1892  |

|                                                                              |                                                                                                                                                     |                  |      |     |    |      |      |       |
|------------------------------------------------------------------------------|-----------------------------------------------------------------------------------------------------------------------------------------------------|------------------|------|-----|----|------|------|-------|
| 115                                                                          | NeuAc $\alpha$ -8NeuAc $\alpha$ -3Gal $\beta$ -4Glc $\beta$ -Cer36                                                                                  | GSC-229          | 26   | -   | -  | 144  | 1    | 169   |
| 116                                                                          | NeuAc $\alpha$ -8NeuAc $\alpha$ -8NeuAc $\alpha$ -3Gal $\beta$ -4Glc $\beta$ -Cer36                                                                 | GSC-437          | -    | 11  | -  | 48   | 5    | 264   |
| 117                                                                          | GalNAc $\beta$ -4Gal $\beta$ -4Glc $\beta$ -Cer<br> <br>NeuAc $\alpha$ -8NeuAc $\alpha$ -3                                                          | GD2              | -    | 35  | -  | -    | 65   | -     |
| 118                                                                          | Gal $\beta$ -3GalNAc $\beta$ -4Gal $\beta$ -4Glc $\beta$ -Cer<br> <br>NeuAc $\alpha$ -8NeuAc $\alpha$ -3                                            | GD1b             | -    | -   | -  | 105  | -    | -     |
| 119                                                                          | NeuAc $\alpha$ -8NeuAc $\alpha$ -3Gal $\beta$ -3GalNAc $\beta$ -4Gal $\beta$ -4Glc $\beta$ -Cer<br> <br>NeuAc $\alpha$ -8NeuAc $\alpha$ -3          | GQ1b             | 172  | 123 | -  | -    | 205  | 2393  |
| <b>2-8 Sialyl Polysialyl</b>                                                 |                                                                                                                                                     |                  |      |     |    |      |      |       |
| 120                                                                          | NeuAc $\alpha$ -8NeuAc $\alpha$ -8NeuAc-DH                                                                                                          | SA3( $\alpha$ 8) | -    | -   | -  | 82   | -    | 548   |
| 121                                                                          | NeuAc $\alpha$ -8NeuAc $\alpha$ -8NeuAc $\alpha$ -8NeuAc $\alpha$ -8NeuAc-DH <sup>c</sup>                                                           | SA5( $\alpha$ 8) | -    | -   | 98 | 529  | 263  | 12527 |
| 122                                                                          | NeuAc $\alpha$ -8NeuAc $\alpha$ -8NeuAc $\alpha$ -8NeuAc $\alpha$ -8NeuAc $\alpha$ -8NeuAc-DH <sup>c</sup>                                          | SA7( $\alpha$ 8) | -    | 23  | -  | 2077 | 1743 | 18260 |
| 123                                                                          | NeuAc $\alpha$ -8NeuAc $\alpha$ -8NeuAc $\alpha$ -8NeuAc $\alpha$ -8NeuAc $\alpha$ -8NeuAc-8NeuAc $\alpha$ -8NeuAc-8NeuAc $\alpha$ -DH <sup>c</sup> | SA9( $\alpha$ 8) | -    | 41  | -  | 2093 | 2538 | 19071 |
| <b>2-3 and 2-8 Sialyl Ganglioside related</b>                                |                                                                                                                                                     |                  |      |     |    |      |      |       |
| 124                                                                          | NeuAc $\alpha$ -8NeuAc $\alpha$ -3Gal $\beta$ -3GalNAc $\beta$ -4Gal $\beta$ -4Glc $\beta$ -Cer<br> <br>NeuAc $\alpha$ -3                           | GT1a             | 61   | -   | -  | 720  | 117  | 3703  |
| 125                                                                          | NeuAc $\alpha$ -3Gal $\beta$ -3GalNAc $\beta$ -4Gal $\beta$ -4Glc $\beta$ -Cer<br> <br>NeuAc $\alpha$ -8NeuAc $\alpha$ -3                           | GT1b             | 4745 | 125 | 88 | 941  | 4520 | 80    |
| <b>2-9 Sialyl Gal, Lactose and N-acetylactosamine-based linear backbones</b> |                                                                                                                                                     |                  |      |     |    |      |      |       |
| 126                                                                          | NeuAc $\alpha$ -9NeuAc $\alpha$ -3Gal $\beta$ -4Glc $\beta$ -Cer36                                                                                  | GSC-96           | -    | -   | 35 | 163  | 57   | 14    |

<sup>a</sup>The oligosaccharide probes are all lipid-linked, and are from the collection assembled in the course of research in Glycosciences Laboratory. DH, designates NGLs prepared from reducing oligosaccharides by reductive amination with the amino lipid, 1,2-dihexadecyl-*sn*-glycero-3-phosphoethanolamine (DHPE) (1); AO, NGLs prepared from reducing oligosaccharides by oxime ligation with an aminoxy-functionalized DHPE (2); Cer, natural glycolipids with various ceramide moieties; GSC, designations for synthetic glycolipids in Kiso laboratory; Cer36, synthetic glycolipids with ceramide having a total of 36 carbon atoms; C30, a synthetic lipid [2-(tetradecyl)hexadecanol] with 30 carbon atoms. NB, Neu denotes de-N-acetylated neuraminic acid.

<sup>b</sup>Numerical scores for the binding signals are shown as means of duplicate spots at 5 fmol/spot (as in Figure 1) and are representative of at least 3 independent experiments; -, Signal less than 1. Shades in grey are signals arisen from artefacts on the array slides with big error bars in Figure 1.

<sup>c</sup>Major component.

1. Chai W, Stoll MS, Galustian C, Lawson AM, Feizi T (2003) Neoglycolipid technology - deciphering information content of glycome. *Methods Enzymol* 362, 160-195.
2. Liu Y, et al. (2007) Neoglycolipid probes prepared via oxime ligation for microarray analysis of oligosaccharide-protein interactions. *Chem Biol* 14, 847-859.

**Table S3** The relative real space correlation coefficient of the ligand to Trp149

|                            | Trp149    | SA-1     | GAL-2        |
|----------------------------|-----------|----------|--------------|
| rVN1194 H5-LSTa            | 0.19(100) | 0.16(84) | 0.14(74)     |
| rVN1194 H5-LSTc            | 0.17(100) | 0.12(71) | 0.11 (65) -l |
| rVN1194(Ala134Val) H5-LSTa | 0.22(100) | 0.09(41) | 0.09(41)-p   |
| rVN1194(Ala134Val) H5-LSTc | 0.23(100) | 0.08(35) |              |
| rVN1194(Glu186Asp) H5-LSTa | 0.20(100) | 0.09(45) | 0.06(30)     |
| rVN1194(Glu186Asp) H5-LSTc | 0.21(100) | 0.1(48)  | 0.12(57)-p   |

-l: only the linker between SA and GAL-2

-p: partial of the GAL-2

**Table S4** Data collection and refinement statistics of rVN1194 H5 HA

|                                    | H5-LSTa             | H5-LSTc             |
|------------------------------------|---------------------|---------------------|
| <b>PDB number</b>                  | 3ZP0                | 3ZP1                |
| <b>Data collection</b>             |                     |                     |
| Space group                        | H32                 | H32                 |
| Cell dimensions                    |                     |                     |
| <i>a</i> , <i>b</i> , <i>c</i> (Å) | 101.2 101.2 449.8   | 101.1 101.1 448.6   |
| $\alpha$ , $\beta$ , $\gamma$ (°)  | 90.0 90.0 120.0     | 90.0 90.0 120.0     |
| Resolution (Å)                     | 30.0-2.5(2.61-2.50) | 30.0-2.6(2.72-2.60) |
| $R_{\text{merge}}$                 | 7.2(41.9)           | 9.0(52.2)           |
| $I/\sigma I$                       | 25.2(3.0)           | 18.2(2.3)           |
| Completeness (%)                   | 94.0(64.8)          | 99.6(97.0)          |
| Redundancy                         | 14.9(9.5)           | 10.4(6.8)           |
| <b>Refinement</b>                  |                     |                     |
| Resolution (Å)                     | 30.0-2.50           | 30.0-2.60           |
| No. reflections                    | 27704               | 24984               |
| $R_{\text{work}}/R_{\text{free}}$  | 18.2/23.6           | 22.5/27.2           |
| No. atoms                          |                     |                     |
| Protein                            | 3821                | 3805                |
| Ligand/ion                         | 129                 | 124                 |
| Water                              | 213                 | 116                 |
| B-factors                          |                     |                     |
| Protein                            | 65.5                | 64.2                |
| Ligand/ion                         | 110.0               | 116.6               |
| Water                              | 64.6                | 55.3                |
| R.m.s deviations                   |                     |                     |
| Bond lengths (Å)                   | 0.009               | 0.009               |
| Bond angles (°)                    | 1.223               | 1.281               |

\*Highest resolution shell is shown in parenthesis.

**Table S5** Data collection and refinement statistics of rVN1194(Ala134Val) H5 HA mutant.

|                                   | H5(Ala134Val)-LSTa  | H5(Ala134Val)-LSTc   |
|-----------------------------------|---------------------|----------------------|
| <b>PDB number</b>                 | 3ZP2                | 3ZP3                 |
| <b>Data collection</b>            |                     |                      |
| Space group                       | H32                 | H32                  |
| Cell dimensions                   |                     |                      |
| <i>a, b, c</i> (Å)                | 101.2 101.2 449.3   | 101.1 101.1 449.2    |
| $\alpha, \beta, \gamma$ (°)       | 90.0 90.0 120.0     | 90.0 90.0 120.0      |
| Resolution (Å)                    | 30.0-2.5(2.61-2.50) | 30.0-2.65(2.77-2.65) |
| $R_{\text{merge}}$                | 7.6(55.1)           | 9.0(51.1)            |
| $I/\sigma I$                      | 19.6(3.8)           | 17.6(4.4)            |
| Completeness (%)                  | 100.0(100.0)        | 100.0(100.0)         |
| Redundancy                        | 10.4(10.1)          | 10.1(9.6)            |
| <b>Refinement</b>                 |                     |                      |
| Resolution (Å)                    | 30.0-2.5            | 30.0-2.65            |
| No. reflections                   | 31234               | 26200                |
| $R_{\text{work}}/R_{\text{free}}$ | 22.1/27.6           | 22.9/26.9            |
| No. atoms                         |                     |                      |
| Protein                           | 3842                | 3842                 |
| Ligand/ion                        | 98/32               | 98/21                |
| Water                             | 207                 | 77                   |
| B-factors                         |                     |                      |
| Protein                           | 59.0                | 54.3                 |
| Ligand/ion                        | 107.7/128.4         | 106.0/128.4          |
| Water                             | 57.4                | 51.6                 |
| R.m.s deviations                  |                     |                      |
| Bond lengths (Å)                  | 0.010               | 0.009                |
| Bond angles (°)                   | 1.273               | 1.192                |

\*Highest resolution shell is shown in parenthesis.

**Table S6** Data collection and refinement statistics of rVN1194(Glu186Asp) H5 HA mutant

|                                   | H5 (Glu186Asp) -LSTa | H5(Glu186Asp) -LSTc  |
|-----------------------------------|----------------------|----------------------|
| <b>PDB number</b>                 | 3ZPb                 | 3ZP6                 |
| <b>Data collection</b>            |                      |                      |
| Space group                       | H32                  | H32                  |
| Cell dimensions                   |                      |                      |
| <i>a, b, c</i> (Å)                | 101.4 101.4 449.6    | 101.4 101.4 450.5    |
| $\alpha, \beta, \gamma$ (°)       | 90.0 90.0 120.0      | 90.0 90.0 120.0      |
| Resolution (Å)                    | 30.0-2.30(2.40-2.30) | 30.0-2.60(2.72-2.60) |
| $R_{\text{merge}}$                | 6.8(26.7)            | 7.8(51.4)            |
| $I/\sigma I$                      | 24.5(4.1)            | 21.8(4.3)            |
| Completeness (%)                  | 99.3(96.5)           | 99.1(97.3)           |
| Redundancy                        | 9.6(4.6)             | 10.3(8.2)            |
| <b>Refinement</b>                 |                      |                      |
| Resolution (Å)                    | 30.0-2.30            | 30.0-2.60            |
| No. reflections                   | 39971                | 27780                |
| $R_{\text{work}}/R_{\text{free}}$ | 21.8/26.0            | 22.3/26.0            |
| No. atoms                         |                      |                      |
| Protein                           | 3839                 | 3839                 |
| Ligand/ion                        | 45/98                | 32/98                |
| Water                             | 167                  | 154                  |
| B-factors                         |                      |                      |
| Protein                           | 55.2                 | 70.6                 |
| Ligand/ion                        | 123.1/109.9          | 135.8/125.3          |
| Water                             | 54.2                 | 73.5                 |
| R.m.s deviations                  |                      |                      |
| Bond lengths (Å)                  | 0.008                | 0.009                |
| Bond angles (°)                   | 1.150                | 1.143                |

\*Highest resolution shell is shown in parenthesis.

**Table S7** Data collection and refinement statistics of rVN1194(Ile151Phe) H5 HA mutant

|                                   | H5(Ile151Phe)        |
|-----------------------------------|----------------------|
| <b>PDB number</b>                 | 3ZPa                 |
| <b>Data collection</b>            |                      |
| Space group                       | H32                  |
| Cell dimensions                   |                      |
| <i>a, b, c</i> (Å)                | 101.0 101.0 448.2    |
| $\alpha, \beta, \gamma$ (°)       | 90.0 90.0 120.0      |
| Resolution (Å)                    | 30.0-2.50(2.61-2.50) |
| $R_{\text{merge}}$                | 9.0(66.7)            |
| $I/\sigma I$                      | 20.3(2.6)            |
| Completeness (%)                  | 98.3(97.9)           |
| Redundancy                        | 10.1(6.6)            |
| <b>Refinement</b>                 |                      |
| Resolution (Å)                    | 30.0-2.50            |
| No. reflections                   | 27673                |
| $R_{\text{work}}/R_{\text{free}}$ | 24.6/28.6            |
| No. atoms                         | 4019                 |
| Protein                           | 3845                 |
| Ligand/ion                        | 98                   |
| Water                             | 76                   |
| B-factors                         |                      |
| Protein                           | 41.0                 |
| Ligand/ion                        | 137.4                |
| Water                             | 39.8                 |
| R.m.s deviations                  |                      |
| Bond lengths (Å)                  | 0.008                |
| Bond angles (°)                   | 1.152                |
